# Supplementary material for: HKT1;1 and HKT1;2 Na+ Transporters from Solanum galapagense Play Different Roles in the Plant Na+ Distribution under Salinity
Source: MDPI journal article supplement (doi:10.3390/ijms23095130), 2022-05-04
Supplement: s1 [file s1]

## Article

# HKT1;1 and HKT1;2 Na<sup>+</sup> Transporters from *Solanum galapagense* Play Different Roles in the Plant Na<sup>+</sup> Distribution under Salinity

Maria J. Asins <sup>1,\*</sup>, Maria R. Romero-Aranda <sup>2</sup>, Jesus Espinosa <sup>3</sup>, Paloma González-Fernández <sup>3</sup>, Emilio Jaime-Fernández <sup>2</sup>, Jose A. Traverso <sup>4</sup>, Emilio A. Carbonell <sup>1</sup> and Andres Belver <sup>3</sup>

<sup>1</sup> Instituto Valenciano de Investigaciones Agrarias (IVIA), Moncada, 46113 Valencia, Spain; carbonell.emi@gmail.com

<sup>2</sup> Department of Plant Breeding and Biotechnology, La Mayora Institute for Mediterranean and Subtropical Horticulture (IHSM), UMA/CSIC, Algarrobo-Costa, 29750 Malaga, Spain; rromero@eelm.csic.es (M.R.R.-A.); emilio@ihsm.uma-csic.es (E.J.-F.)

<sup>3</sup> Department of Stress, Development and Signaling of Plants, Estación Experimental del Zaidín (EEZ), Consejo Superior de Investigaciones Científicas (CSIC), C/Prof. Albareda 1, 18008 Granada, Spain; jesusespinosa@eez.csic.es (J.E.); paloma.gonzalez.fernandez@hotmail.es (P.G.-F.); andres.belver@eez.csic.es (A.B.)

<sup>4</sup> Department of Cellular Biology, Faculty of Sciences, University of Granada, 18071 Granada, Spain; traverso@ugr.es

\* Correspondence: mjasins@ivia.es; Tel.: +34-96-342-4067

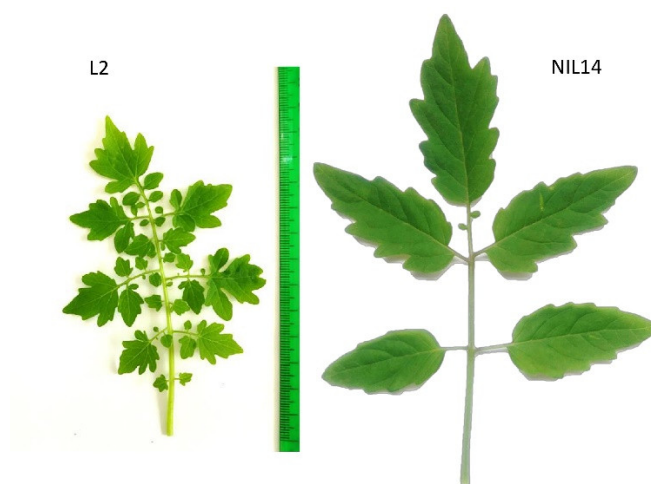

**Figure S1.** Mature fully expanded leaves of NIL14, from which silenced HKT1 lines were obtained, and of the salt tolerant line L2 [4] that was the wild parent of the RIL population from which NIL14 was obtained. L2 has now been reclassified as *S. galapagense* because of its leaf morphology [38–39].

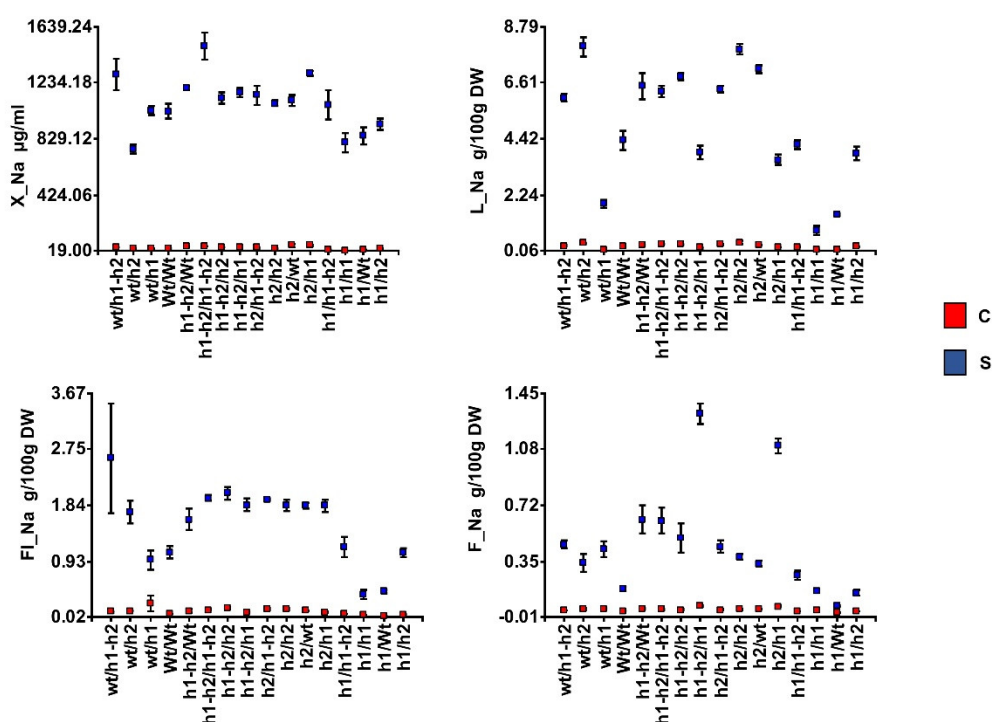

**Figure S2.** Means and standard errors for Na contents of leaf (L\_Na), inflorescence (FI\_Na), Fruit (F\_Na) and xylem sap Na concentration (X\_Na) of the 16 reciprocal rootstock/scion graft combinations involving non-silenced (Wt), single RNAi-silenced lines for *SgHKT1;1* (h1), *SgHKT1;2* (h2), as well as doubly silenced line at both loci (h1-h2) (For instance, Wt/h1 indicates wild type rootstock and silenced *SgHKT1;1* scion genotypes). Red and blue squares correspond to control and salinity conditions, respectively.

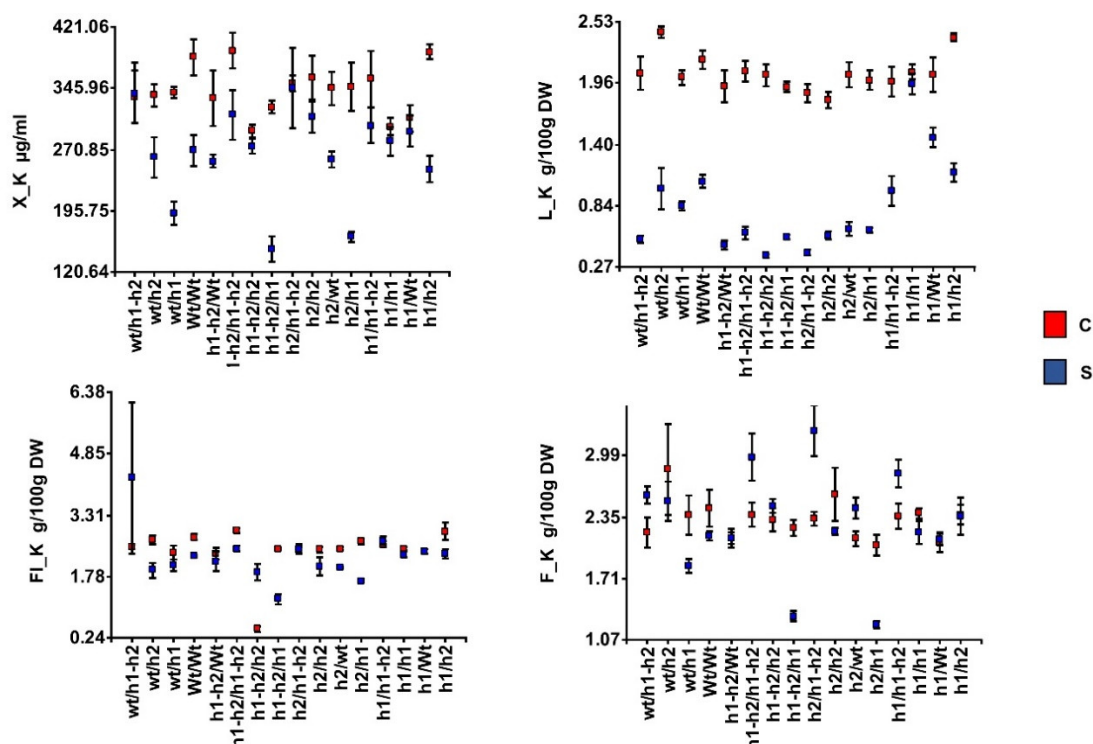

**Figure S3.** Means and standard errors for K contents of leaf (L\_K), inflorescence (FI\_K), Fruit (F\_K) and xylem sap K<sup>+</sup> concentration (X\_K) of the 16 reciprocal rootstock/scion graft combinations involving non-silenced (Wt), single RNAi-silenced lines for *SgHKT1;1* (h1), *SgHKT1;2* (h2), as well as doubly silenced line at both loci (h1-h2). Red and blue squares correspond to control and salinity conditions, respectively.

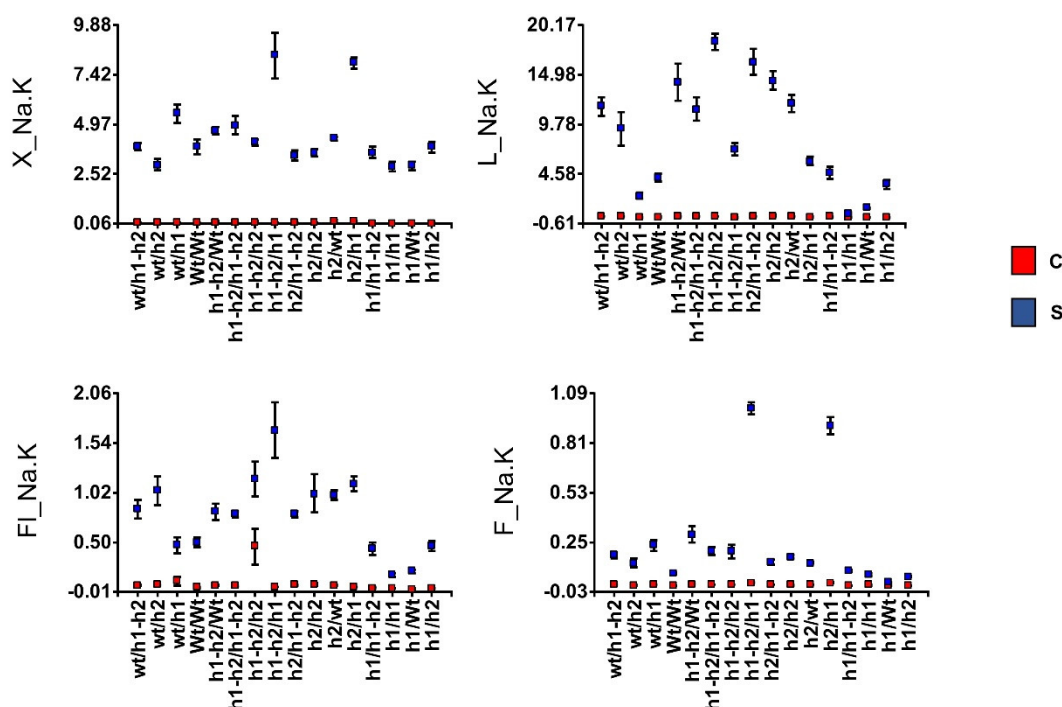

**Figure S4.** Means and standard errors for Na/K ratio of leaf (L\_Na.K), inflorescence (FI\_Na.K), Fruit (F\_Na.K) and xylem sap (X\_Na.K) of the 16 reciprocal rootstock/scion graft combinations involving non-silenced (Wt), single RNAi-silenced lines for *SgHKT1;1* (h1), *SgHKT1;2* (h2), as well as doubly silenced line at both loci (h1-h2). Red and blue squares correspond to control and salinity conditions, respectively.

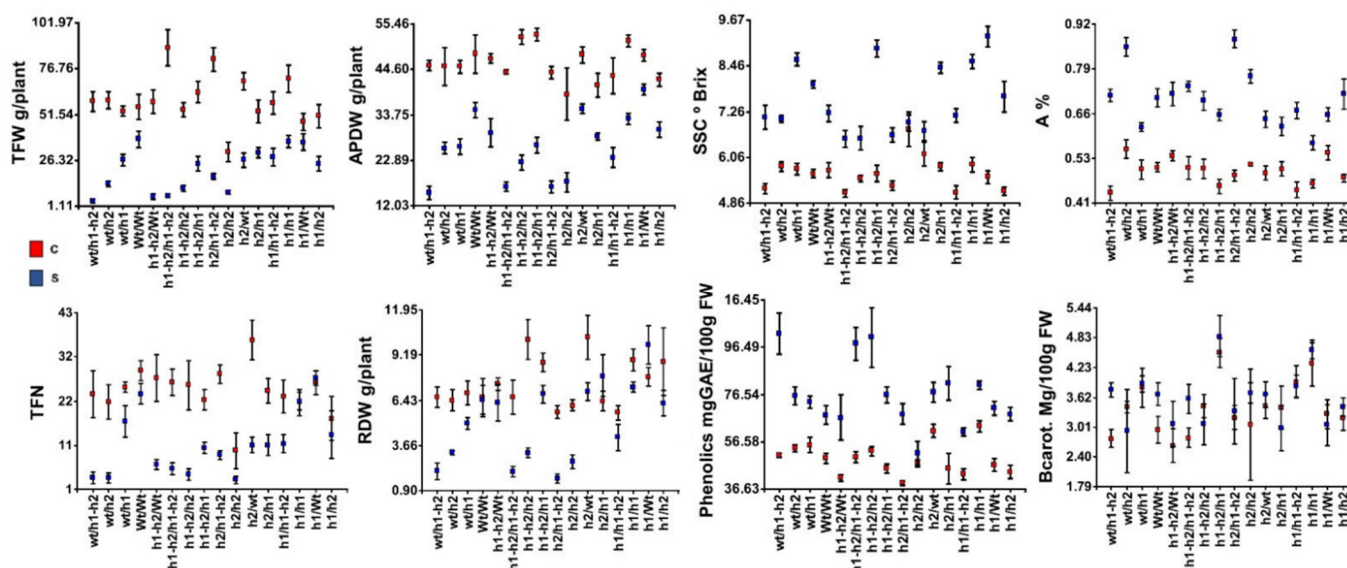

**Figure S5.** Means and standard errors for total fruit weight (TFW), total fruit number (TFN), dry weight of the aerial part of the plant (APDW), root dry weight (RDW) and fruit contents of soluble solids content (SSC), phenolics,  $\beta$ -carotenoids, and fruit juice acidity (A) of the 16 reciprocal rootstock/scion graft combinations involving non-silenced (Wt), single RNAi-silenced lines for *SgHKT1;1* (h1), *SgHKT1;2* (h2), as well as doubly silenced line at both loci (h1-h2). Red and blue squares correspond to control and salinity conditions, respectively.

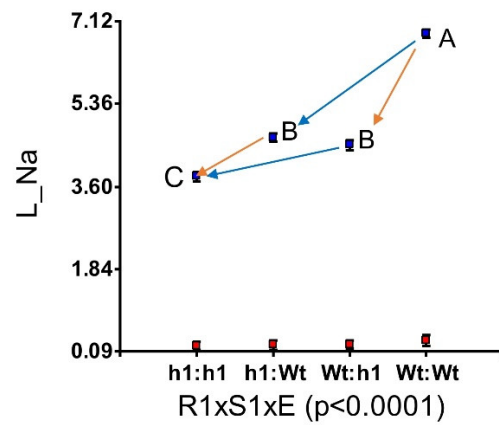

**Figure S6.** Adjusted means and standard errors of significant triple interaction  $R1 \times S1 \times E$  ( $p < 0.0001$ ) for leaf Na content ( $L\_Na$ , g/100g dry weight). Means of genotypic combinations under salinity (blue squares) with different letters were significant by LSD Fisher ( $\alpha = 0.05$ ). No differences were found in control (red squares). Arrows show the directions of the effects of silencing *SgHKT1;1* at the scion (orange arrows) and at the root (blue arrows). In all cases, leaf Na content decreases.

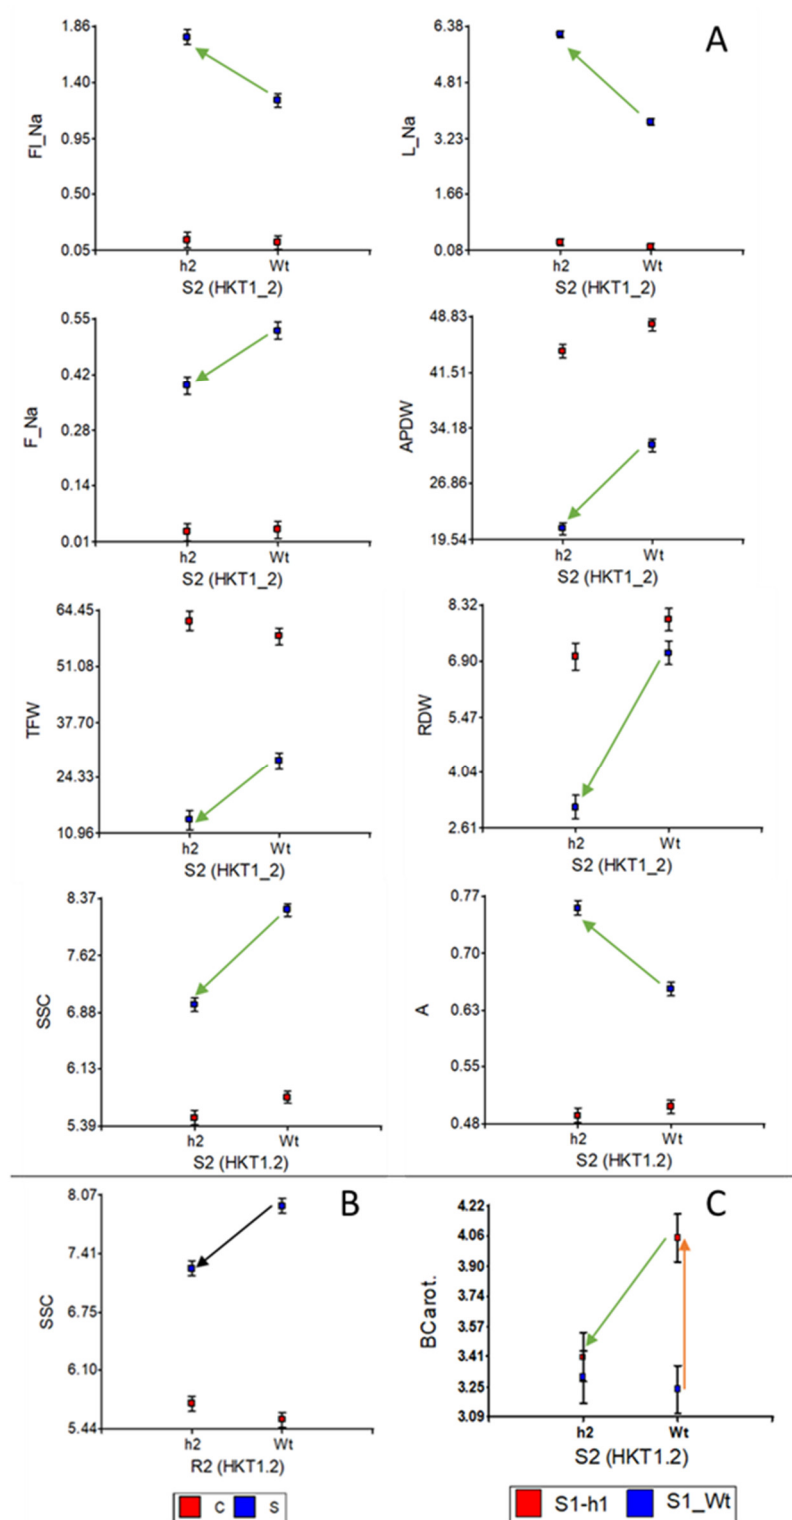

**Figure S7.** Adjusted means and standard errors of significant S2×E interactions (**A**) for Na contents of leaf, fruit and inflorescence, vegetative traits (APDW, RDW), and agronomic traits (TFW, SSC and A). Green arrows show the direction of the effect on the trait when silencing SgHKT1;2 at the scion. Red and blue squares correspond to control and salinity conditions, respectively. (**B**) Adjusted means and standard errors of significant R2 × E interaction for SSC, and (**C**) S2 × S1 for β-carotenoids. The black arrow shows the direction of the effect on SSC (decreasing SSC) when silencing SgHKT1;2 at the rootstock. The upwards orange arrow shows the increasing effect on β-carotenoids fruit content when silencing SgHKT1;1 at the scion.

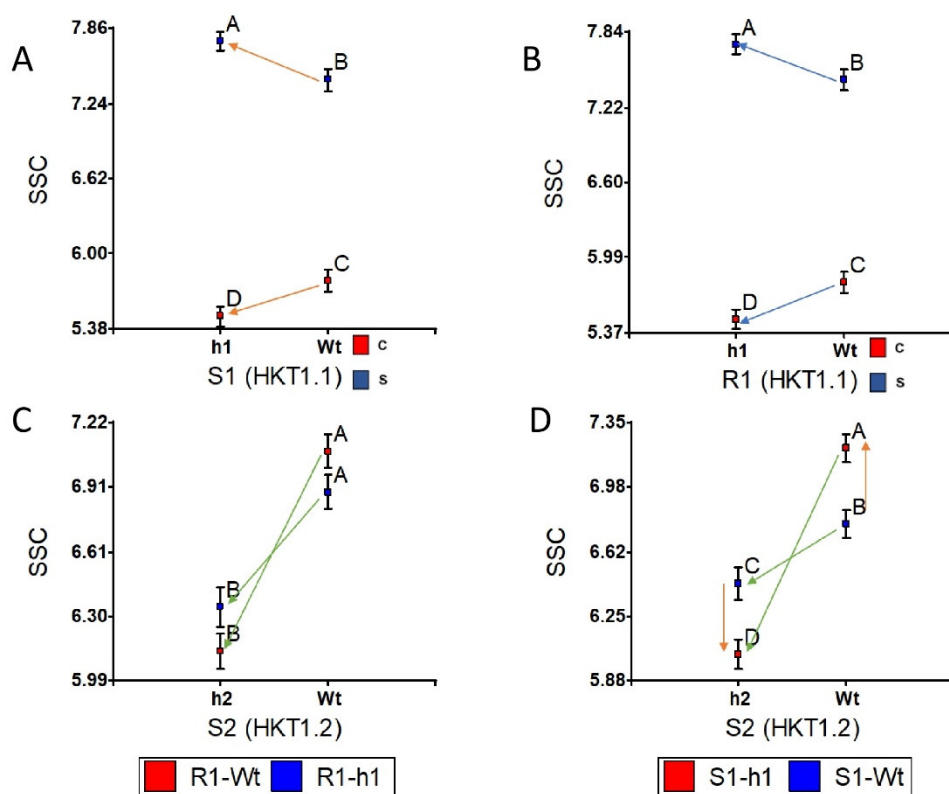

**Figure S8.** Adjusted means and standard errors of significant S1 × E (A), R1 × E (B), S2 × R1 (C) and S2 × S1 (D) interactions for SSC. Red and blue squares correspond to salinity and control conditions, respectively, in (A) and (B). Means with different letters are significantly different at 5% level. Arrows show the directions of the effects of silencing *SgHKT1;1* at the scion (orange arrows) and at the root (blue arrows), and silencing *SgHKT1;2* at the scion (green arrows).

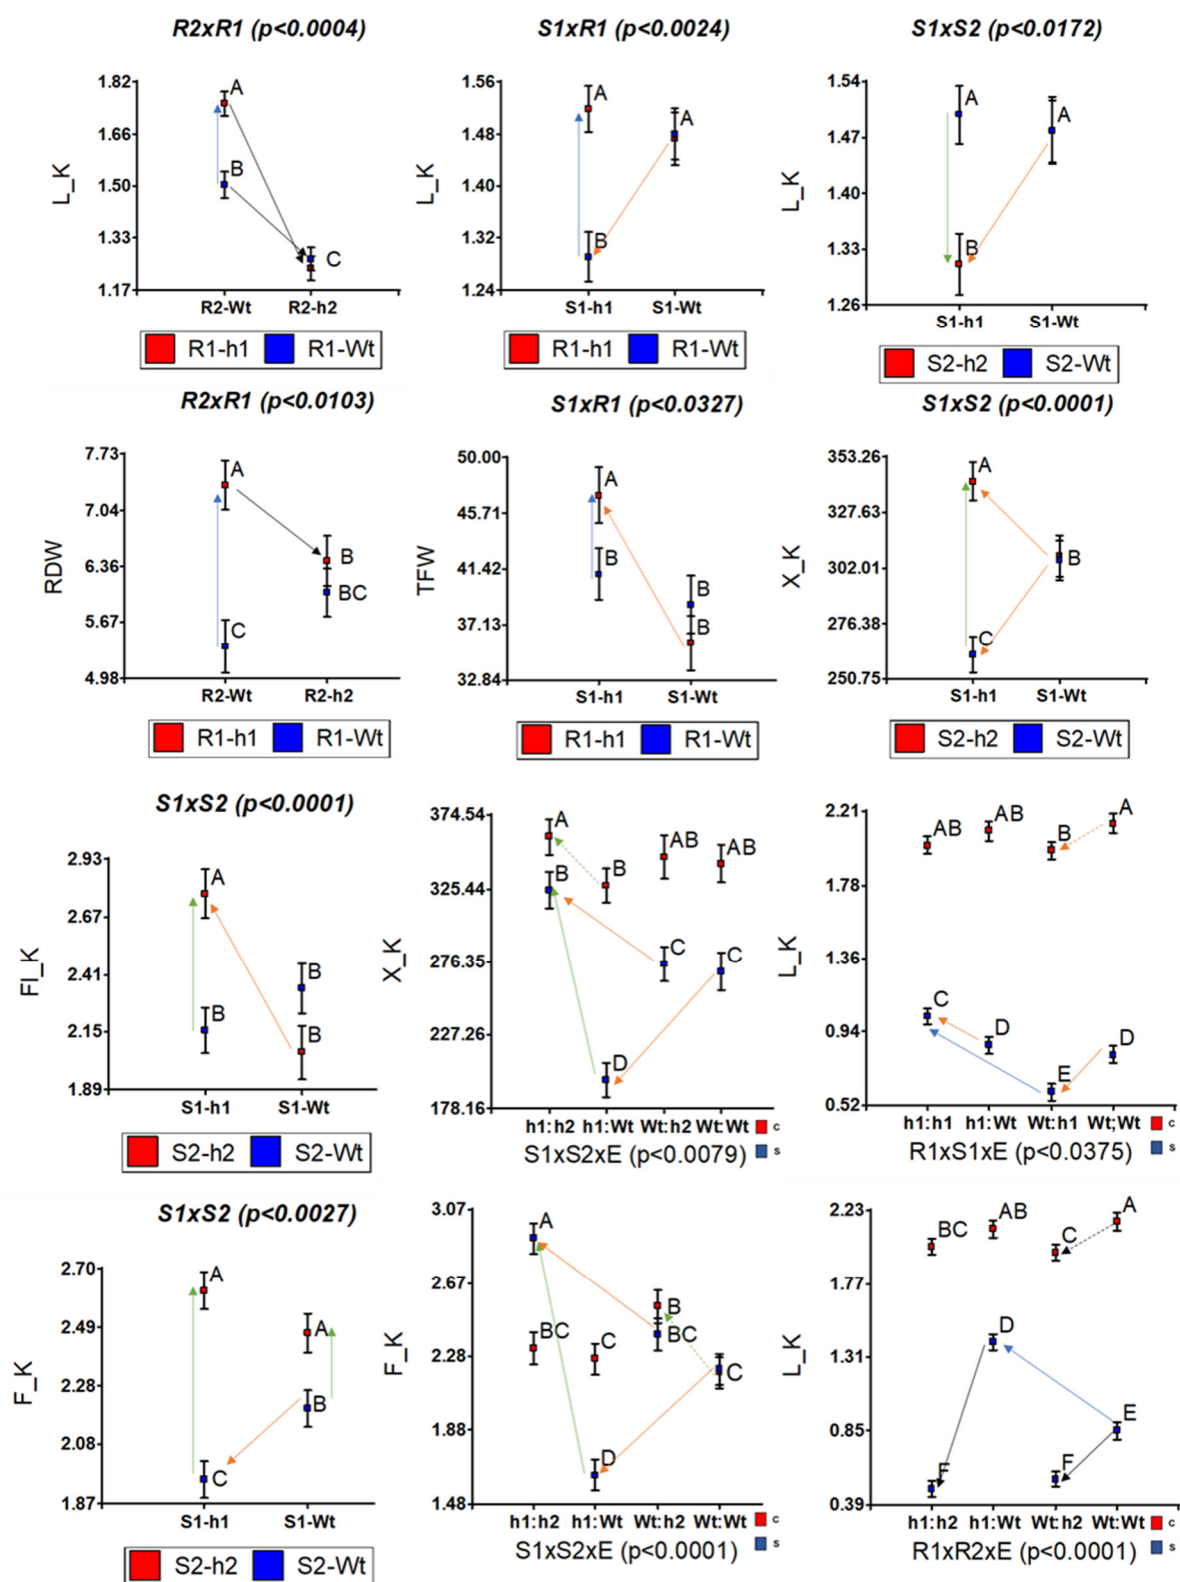

**Figure S9.** Adjusted means and standard errors of significant binary and triple interactions affecting K contents of leaf (L\_K, g/100g DW), inflorescence (FI\_K, g/100g DW) and fruit (F\_K, g/100g DW), and xylem sap [K<sup>+</sup>] (X\_K,  $\mu\text{g/ml}$ ). Two of these interactions R2  $\times$  R1 and R1  $\times$  S1 also affects fruit yield (TFW, g/plant), and R2  $\times$  R1 to root dry weight (RDW, g/plant). Arrows show the directions of the effects of silencing *SgHKT1;1* at the scion (orange arrows) and at the root (blue arrows), and silencing *SgHKT1;2* at the scion (green arrows) and at the root (black arrows). Arrows with a discontinuous line correspond to changes under control conditions. Means with different letters are significantly different at 5% level.



**Table S1.** Pearson coefficients of significantly correlated ( $p < 0.05$ ) traits under control conditions (Pearson\_C) and under salinity (Pearson\_S). Shaded in yellow, Pearson coefficients for same trait, different salinity level.

| Trait 1 | Trait 2 | Pearson_C | p-Value |
|---------|---------|-----------|---------|
| βCarot. | TCarot. | 0.94      | <0.0001 |
| APDW    | RDW     | 0.67      | 0.0047  |
| F_Na    | F_Na.K  | 0.83      | 0.0001  |
| F_Na    | X_Na.K  | 0.5       | 0.0478  |
| F_Na.K  | X_Na    | 0.57      | 0.0212  |
| F_Na.K  | X_Na.K  | 0.6       | 0.0134  |
| Fl_K    | Fl_Na.K | −0.95     | <0.0001 |
| Fl_K    | X_K     | 0.64      | 0.007   |
| L_Na    | βCarot. | −0.53     | 0.0366  |
| L_Na    | L_Na.K  | 0.97      | <0.0001 |
| L_Na.K  | βCarot. | −0.52     | 0.038   |
| Lyc.    | βCarot. | 0.53      | 0.0337  |
| Lyc.    | TCarot. | 0.79      | 0.0003  |
| RDW     | AP.R    | −0.88     | <0.0001 |
| SSC     | Lyc.    | 0.6       | 0.0143  |
| TFN     | Lyc.    | −0.53     | 0.0329  |
| TFN     | TFW     | 0.56      | 0.0231  |
| TFN     | X_Na.K  | 0.5       | 0.0464  |
| TFW     | Lyc.    | −0.7      | 0.0027  |
| X_K     | APDW    | −0.64     | 0.008   |
| X_Na    | X_Na.K  | 0.95      | <0.0001 |
| Trait 1 | Trait 2 | Pearson_S | p-value |
| βCarot. | TCarot. | 0.95      | <0.0001 |
| A       | SSC     | −0.61     | 0.0113  |
| AP.R    | A       | 0.81      | 0.0002  |
| AP.R    | SSC     | −0.75     | 0.0009  |
| APDW    | A       | −0.52     | 0.0388  |
| APDW    | AP.R    | −0.75     | 0.0008  |
| APDW    | RDW     | 0.92      | <0.0001 |
| APDW    | SSC     | 0.6       | 0.0132  |
| F_K     | A       | 0.59      | 0.0165  |
| F_K     | AP.R    | 0.82      | 0.0001  |
| F_K     | F_Na.K  | −0.73     | 0.0015  |
| F_K     | Fl_K    | 0.53      | 0.0348  |
| F_K     | RDW     | −0.67     | 0.0047  |
| F_K     | SSC     | −0.75     | 0.0009  |
| F_K     | X_K     | 0.87      | <0.0001 |
| F_K     | X_Na.K  | −0.71     | 0.0021  |
| F_Na    | F_K     | −0.54     | 0.0309  |
| F_Na    | F_Na.K  | 0.96      | <0.0001 |
| F_Na    | Fl_Na   | 0.53      | 0.0358  |
| F_Na    | Fl_Na.K | 0.8       | 0.0002  |
| F_Na    | L_K     | −0.57     | 0.0207  |
| F_Na    | X_K     | −0.62     | 0.0108  |
| F_Na    | X_Na    | 0.59      | 0.0159  |
| F_Na    | X_Na.K  | 0.92      | <0.0001 |



|         |         |       |         |
|---------|---------|-------|---------|
| F_Na.K  | Fl_K    | −0.51 | 0.0445  |
| F_Na.K  | Fl_Na.K | 0.7   | 0.0023  |
| F_Na.K  | X_K     | −0.76 | 0.0007  |
| F_Na.K  | X_Na.K  | 0.95  | <0.0001 |
| Fl_K    | X_K     | 0.7   | 0.0027  |
| Fl_Na   | AP.R    | 0.53  | 0.0367  |
| Fl_Na   | APDW    | −0.71 | 0.0022  |
| Fl_Na   | Fl_Na.K | 0.77  | 0.0005  |
| Fl_Na   | L_K     | −0.87 | <0.0001 |
| Fl_Na   | L_Na    | 0.78  | 0.0004  |
| Fl_Na   | L_Na.K  | 0.8   | 0.0002  |
| Fl_Na   | RDW     | −0.64 | 0.008   |
| Fl_Na   | SSC     | −0.64 | 0.0071  |
| Fl_Na   | X_Na    | 0.68  | 0.004   |
| Fl_Na.K | L_K     | −0.74 | 0.001   |
| Fl_Na.K | L_Na    | 0.58  | 0.0187  |
| Fl_Na.K | L_Na.K  | 0.6   | 0.0142  |
| Fl_Na.K | X_Na.K  | 0.62  | 0.0101  |
| L_K     | APDW    | 0.61  | 0.0123  |
| L_K     | L_Na.K  | −0.81 | 0.0001  |
| L_K     | RDW     | 0.53  | 0.0352  |
| L_K     | SSC     | 0.57  | 0.022   |
| L_K     | X_Na    | −0.72 | 0.0015  |
| L_Na    | A       | 0.71  | 0.002   |
| L_Na    | AP.R    | 0.61  | 0.012   |
| L_Na    | APDW    | −0.53 | 0.0366  |
| L_Na    | L_K     | −0.7  | 0.0025  |
| L_Na    | L_Na.K  | 0.86  | <0.0001 |
| L_Na    | RDW     | −0.66 | 0.0057  |
| L_Na    | SSC     | −0.86 | <0.0001 |
| L_Na.K  | A       | 0.59  | 0.0169  |
| L_Na.K  | AP.R    | 0.61  | 0.0116  |
| L_Na.K  | APDW    | −0.61 | 0.0119  |
| L_Na.K  | RDW     | −0.65 | 0.0062  |
| L_Na.K  | SSC     | −0.8  | 0.0002  |
| Lyc.    | βCarot. | 0.59  | 0.0153  |
| Lyc.    | TCarot. | 0.81  | 0.0001  |
| RDW     | A       | −0.67 | 0.0045  |
| RDW     | AP.R    | −0.89 | <0.0001 |
| RDW     | SSC     | 0.77  | 0.0005  |
| TFN     | A       | −0.54 | 0.0319  |
| TFN     | AP.R    | −0.54 | 0.0296  |
| TFN     | APDW    | 0.78  | 0.0004  |
| TFN     | Fl_Na   | −0.86 | <0.0001 |
| TFN     | Fl_Na.K | −0.67 | 0.0043  |
| TFN     | L_K     | 0.75  | 0.0009  |
| TFN     | L_Na    | −0.83 | 0.0001  |
| TFN     | L_Na.K  | −0.8  | 0.0002  |
| TFN     | RDW     | 0.75  | 0.0009  |
| TFN     | SSC     | 0.74  | 0.001   |
| TFN     | TFW     | 0.9   | <0.0001 |

| TFW       | A         | −0.56   | 0.0227  |
|-----------|-----------|---------|---------|
| TFW       | AP.R      | −0.6    | 0.014   |
| TFW       | APDW      | 0.76    | 0.0006  |
| TFW       | Fl_Na     | −0.77   | 0.0005  |
| TFW       | L_K       | 0.68    | 0.0035  |
| TFW       | L_Na      | −0.76   | 0.0006  |
| TFW       | L_Na.K    | −0.8    | 0.0002  |
| TFW       | RDW       | 0.75    | 0.0008  |
| TFW       | SSC       | 0.71    | 0.0022  |
| X_K       | AP.R      | 0.71    | 0.0022  |
| X_K       | RDW       | −0.55   | 0.0258  |
| X_K       | SSC       | −0.59   | 0.016   |
| X_K       | X_Na.K    | −0.81   | 0.0002  |
| X_Na      | APDW      | −0.55   | 0.0257  |
| X_Na      | X_Na.K    | 0.52    | 0.0377  |
| Trait_C   | Trait_S   | Pearson | p-value |
| βCarot._C | βCarot._S | 0.66    | 0.0052  |
| AP.R._C   | AP.R._S   | 0.52    | 0.0399  |
| F_Na.K._C | F_Na.K._S | 0.89    | <0.0001 |
| F_Na._C   | F_Na._S   | 0.89    | <0.0001 |
| L_Na.K._C | L_Na.K._S | 0.88    | <0.0001 |
| L_Na._C   | L_Na._S   | 0.97    | <0.0001 |
| TCarot._C | TCarot._S | 0.53    | 0.0341  |
| X_Na._C   | X_Na._S   | 0.72    | 0.0017  |
| X_Na.K._C | X_Na.K._S | 0.56    | 0.025   |

**Table S2.** *p* values of significant effects and interactions of the Genotype (*S. galapagense* allele versus its silenced form) at HKT1.1 (1) and HKT1.2 (2), in the rootstock (R1 and R2), the scion, (S1 and S2), and the salinity treatment (E) for evaluated traits (see section 4.2 for trait abbreviations).

| Trait     | R2xS2   | R2xS1   | R1xS2  | R1xS1   | S1xS2   | R1xR2   | S2xE    | S1xE    | R2xE    | R1xE    | E       | S2      | S1      | R2      | R1      |
|-----------|---------|---------|--------|---------|---------|---------|---------|---------|---------|---------|---------|---------|---------|---------|---------|
| F_Na      | <0.0001 | 0.0015  |        |         | <0.0001 | <0.0001 | 0.0022  | <0.0001 | <0.0001 |         | <0.0001 | 0.0008  | <0.0001 | <0.0001 |         |
| F_K       | 0.0213  |         |        | 0.0370  | 0.0027  |         | 0.0001  |         |         |         |         | <0.0001 |         |         |         |
| F_Na/K    | <0.0001 | <0.0001 |        |         | <0.0001 | 0.0114  | <0.0001 | <0.0001 | <0.0001 |         | <0.0001 | <0.0001 | <0.0001 | <0.0001 |         |
| Fl_Na     | 0.0007  |         |        |         |         | <0.0001 | <0.0001 |         | <0.0001 | 0.0029  | <0.0001 | <0.0001 |         | <0.0001 | 0.0002  |
| Fl_K      |         |         |        |         | 0.0001  |         | 0.0053  |         |         |         |         |         | 0.0202  | 0.0004  |         |
| Fl_Na/K   | 0.0013  |         |        |         | 0.0001  | <0.0001 |         |         | <0.0001 |         | <0.0001 |         |         | <0.0001 |         |
| L_Na      | 0.0411  | <0.0001 | 0.0377 | <0.0001 | 0.0002  | <0.0001 | <0.0001 | <0.0001 | <0.0001 | <0.0001 | <0.0001 | <0.0001 | <0.0001 | <0.0001 | <0.0001 |
| L_K       |         |         |        | 0.0024  | 0.0172  | 0.0004  | 0.0001  |         | <0.0001 | 0.0019  | <0.0001 | 0.0181  |         | <0.0001 | 0.0046  |
| L_Na/K    |         | 0.0001  | 0.0167 | 0.0287  | 0.0043  | <0.0001 | <0.0001 | 0.0004  | <0.0001 | 0.0056  | <0.0001 | <0.0001 | 0.0013  | <0.0001 | 0.0045  |
| X_Na      |         |         | 0.0015 |         | 0.0010  | 0.0074  |         | 0.0003  | <0.0001 |         | <0.0001 |         | <0.0001 | <0.0001 |         |
| X_K       | 0.0279  |         |        |         | <0.0001 |         | 0.0037  |         |         |         | <0.0001 | <0.0001 |         |         |         |
| X_Na/K    |         |         |        |         | <0.0001 |         | 0.0001  | 0.0018  | 0.0048  |         | <0.0001 |         | 0.0001  | 0.0083  |         |
| TFN       |         |         | 0.0392 |         | 0.0009  |         | 0.0460  |         | 0.0002  |         | <0.0001 | <0.0001 |         | 0.0150  |         |
| TFW       |         | 0.0236  |        | 0.0327  | 0.0480  |         | <0.0001 | 0.0166  | 0.0002  |         | <0.0001 | 0.0140  | 0.0014  |         |         |
| APDW      |         |         |        |         |         |         | <0.0001 | 0.0011  | 0.0112  |         | <0.0001 | <0.0001 | 0.0001  | 0.0100  | 0.0008  |
| RDW       |         |         |        |         |         | 0.0103  | <0.0001 |         | 0.0372  |         | <0.0001 | <0.0001 | 0.0006  |         | 0.0002  |
| AR/R      | 0.0065  |         |        |         | 0.0001  | 0.0301  | <0.0001 |         | 0.0396  |         |         | <0.0001 | 0.0059  |         | 0.0008  |
| A         |         | 0.0004  | 0.0030 |         |         |         | <0.0001 |         |         | 0.0454  | <0.0001 | <0.0001 | 0.0001  |         | 0.0059  |
| SSC       |         |         | 0.0164 |         | <0.0001 |         | <0.0001 | 0.0003  | <0.0001 | 0.0006  | <0.0001 | <0.0001 |         | 0.0024  |         |
| βCarot.   |         |         |        | 0.0008  | 0.0088  |         |         |         |         |         |         | 0.0333  | 0.0007  |         |         |
| TCarot.   |         |         |        | 0.0035  | 0.0232  |         |         |         |         |         |         |         | 0.0202  |         |         |
| Phenolics |         |         |        |         |         | 0.0026  |         |         |         |         | <0.0001 |         |         |         |         |
